# Supplementary material for: RETRACTED ARTICLE: Neurotropic influenza A virus infection causes prion protein misfolding into infectious prions in neuroblastoma cells
Source: PubMed Central journal article supplement (PMC8115602; doi:10.1038/s41598-021-89586-6), 2021-05-12
Supplement: 41598_2021_89586_MOESM1_ESM.pdf [file 41598_2021_89586_MOESM1_ESM.pdf]

## Supplementary Information

### **Neurotropic influenza A virus infection causes prion protein misfolding into infectious prions in neuroblastoma cells**

Hideyuki Hara, Junji Chida, Keiji Uchiyama, Agriani Dini Pasiana, Etsuhisa

Takahashi, Hiroshi Kido & Suehiro Sakaguchi

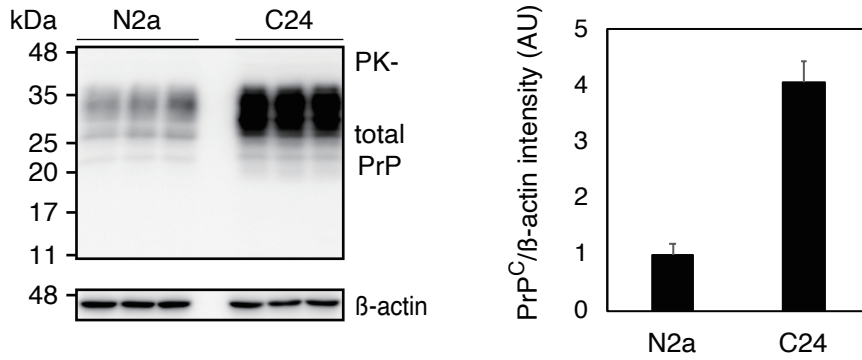

**Supplementary Figure 1. PrP expression level of N2a and N2aC24 cells.** (Left panels) Western blotting with 6D11 antibody of 40  $\mu$ g proteins from N2a (n = 3) and N2aC24 (n = 3) cells.  $\beta$ -actin was used as an internal control. (Right panel) Expression level of PrP<sup>C</sup> in N2aC24 compared to those in N2a cells. AU, arbitrary units. Full length blots of Western blot images are shown in Supplementary Figure 5a, b.

```

Prnp: ATGGCGAACC TTGGCTACTG GCTGCTGGCC CTCTTTGTGA CTATGTGGAC TGATGTCGGC 60
*****
C24: ATGGCGAACC TTGGCTACTG GCTGCTGGCC CTCTTTGTGA CTATGTGGAC TGATGTCGGC
*****
C24R1: ATGGCGAACC TTGGCTACTG GCTGCTGGCC CTCTTTGTGA CTATGTGGAC TGATGTCGGC

Prnp: CTCTGCAAAA AGCGGCCAAA GCCTGGAGGG TGGAAACACCG GTGGAAGCCG GTATCCCGGG 120
*****
C24: CTCTGCAAAA AGCGGCCAAA GCCTGGAGGG TGGAAACACCG GTGGAAGCCG GTATCCCGGG
*****
C24R1: CTCTGCAAAA AGCGGCCAAA GCCTGGAGGG TGGAAACACCG GTGGAAGCCG GTATCCCGGG

Prnp: CAGGGAAGCC CTGGAGGCAA CCGTTACCCA CCTCAGGGTG GCACCTGGGG GCAGCCCCAC 180
*****
C24: CAGGGAAGCC CTGGAGGCAA CCGTTACCCA CCTCAGGGTG GCACCTGGGG GCAGCCCCAC
*****
C24R1: CAGGGAAGCC CTGGAGGCAA CCGTTACCCA CCTCAGGGTG GCACCTGGGG GCAGCCCCAC

Prnp: GGTGGTGGCT GGGGACAACC CCATGGGGGC AGCTGGGGAC AACCTCATGG TGGTAGTTGG 240
*****
C24: GGTGGTGGCT GGGGACAACC CCATGGGGGC AGCTGGGGAC AACCTCATGG TGGTAGTTGG
*****
C24R1: GGTGGTGGCT GGGGACAACC CCATGGGGGC AGCTGGGGAC AACCTCATGG TGGTAGTTGG

Prnp: GGTGAGCCCC ATGGCGGTGG ATGGGGCCAA GGAGGGGGTA CCCATAATCA GTGGAACAAG 300
*****
C24: GGTGAGCCCC ATGGCGGTGG ATGGGGCCAA GGAGGGGGTA CCCATAATCA GTGGAACAAG
*****
C24R1: GGTGAGCCCC ATGGCGGTGG ATGGGGCCAA GGAGGGGGTA CCCATAATCA GTGGAACAAG

Prnp: CCCAGCAAAC CAAAAACCAA CCTCAAGCAT GTGGCAGGGG CTGCGGCAGC TGGGGCAGTA 360
*****
C24: CCCAGCAAAC CAAAAACCAA CCTCAAGCAT GTGGCAGGGG CTGCGGCAGC TGGGGCAGTA
*****
C24R1: CCCAGCAAAC CAAAAACCAA CCTCAAGCAT GTGGCAGGGG CTGCGGCAGC TGGGGCAGTA

Prnp: GTGGGGGGCC TTGGTGGCTA CATGCTGGGG AGCGCCATGA GCAGGCCAT GATCCATTTT 420
*****
C24: GTGGGGGGCC TTGGTGGCTA CATGCTGGGG AGCGCCATGA GCAGGCCAT GATCCATTTT
*****
C24R1: GTGGGGGGCC TTGGTGGCTA CATGCTGGGG AGCGCCATGA GCAGGCCAT GATCCATTTT

Prnp: GGCAACGACT GGGAGGACCG CTACTIONCGT GAAAACATGT ACCGCTACCC TAACCAAGTG 480
*****
C24: GGCAACGACT GGGAGGACCG CTACTIONCGT GAAAACATGT ACCGCTACCC TAACCAAGTG
*****
C24R1: GGCAACGACT GGGAGGACCG CTACTIONCGT GAAAACATGT ACCGCTACCC TAACCAAGTG

Prnp: TACTACAGGC CAGTGGATCA GTACAGCAAC CAGAACAAC TCGTGCACGA CTGCGTCAAT 540
*****
C24: TACTACAGGC CAGTGGATCA GTACAGCAAC CAGAACAAC TCGTGCACGA CTGCGTCAAT
*****
C24R1: TACTACAGGC CAGTGGATCA GTACAGCAAC CAGAACAAC TCGTGCACGA CTGCGTCAAT

Prnp: ATCACCATCA AGCAGCACAC GGTCACCACC ACCACCAAGG GGGAGAACTT CACCGAGACC 600
*****
C24: ATCACCATCA AGCAGCACAC GGTCACCACC ACCACCAAGG GGGAGAACTT CACCGAGACC
*****
C24R1: ATCACCATCA AGCAGCACAC GGTCACCACC ACCACCAAGG GGGAGAACTT CACCGAGACC

Prnp: GATGTGAAGA TGATGGAGCG CGTGGTGGAG CAGATGTGCG TCACCCAGTA CCAGAAGGAG 660
*****
C24: GATGTGAAGA TGATGGAGCG CGTGGTGGAG CAGATGTGCG TCACCCAGTA CCAGAAGGAG
*****
C24R1: GATGTGAAGA TGATGGAGCG CGTGGTGGAG CAGATGTGCG TCACCCAGTA CCAGAAGGAG

Prnp: TCCCAGGCCT ATTACGACGG GAGAAGATCC AGCAGCACCG TGCTTTTCTC CTCCCCTCCT 720
*****
C24: TCCCAGGCCT ATTACGACGG GAGAAGATCC AGCAGCACCG TGCTTTTCTC CTCCCCTCCT
*****
C24R1: TCCCAGGCCT ATTACGACGG GAGAAGATCC AGCAGCACCG TGCTTTTCTC CTCCCCTCCT

Prnp: GTCATCTCC TCATCTCCTT CCTCATCTTC CTGATCGTGG GATGA 765
*****
C24: GTCATCTCC TCATCTCCTT CCTCATCTTC CTGATCGTGG GATGA
*****
C24R1: GTCATCTCC TCATCTCCTT CCTCATCTTC CTGATCGTGG GATGA

```

**Supplementary Figure 2. No mutations detected in the PrP-coding sequences in N2aC24 (R1) cells.** The PCR-amplified DNA fragments of the PrP-coding sequence were cloned from N2aC24 and N2aC24(R1) cells. Eight and 6 cloned fragments from N2aC24 and N2aC24(R1) cells were sequenced, respectively. All of them had identical sequences to each other, and to the PrP-coding sequence of the murine *Prnp* (GeneBank accession number BC006703.1). The sequences are shown from the initiation codon to the stop codon. \*, identical nucleotides.

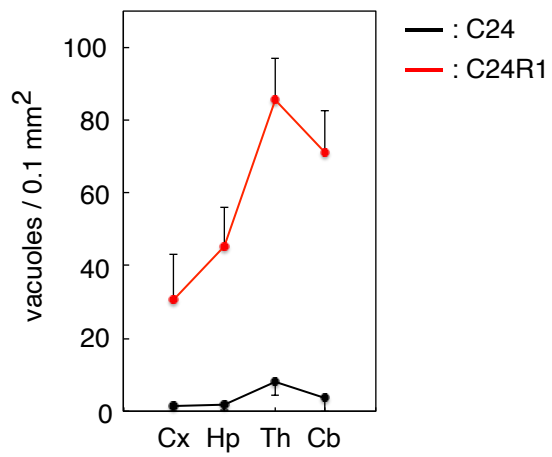

**Supplementary Figure 3. Vacuole formation in the brains of terminally ill mice after inoculation with N2aC24R1 cell lysate.** Vacuole counts at different brain areas of terminally ill mice in Fig. 3d. Cx, cerebral cortex; Hp, hippocampus; Th, thalamus; Cb, cerebellum.

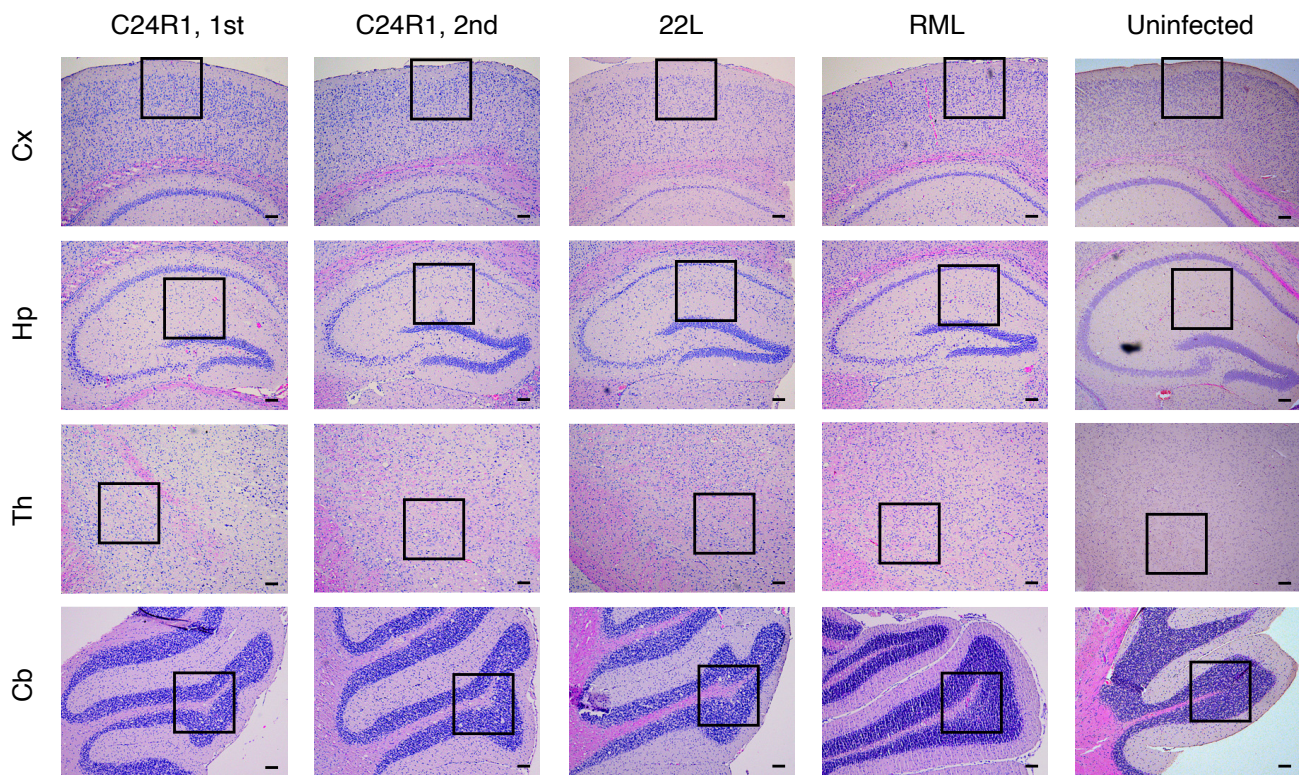

**Supplementary Figure 4. Different pathological properties of prions in N2aC24R1 cells from RML and 22L prions.** HE staining of brains in Fig. 5b at lower magnification. Uninfected brains were used as a control. Cx, cerebral cortex; Hp, hippocampus; Th, thalamus; Cb, cerebellum. Bars, 100  $\mu$ m.

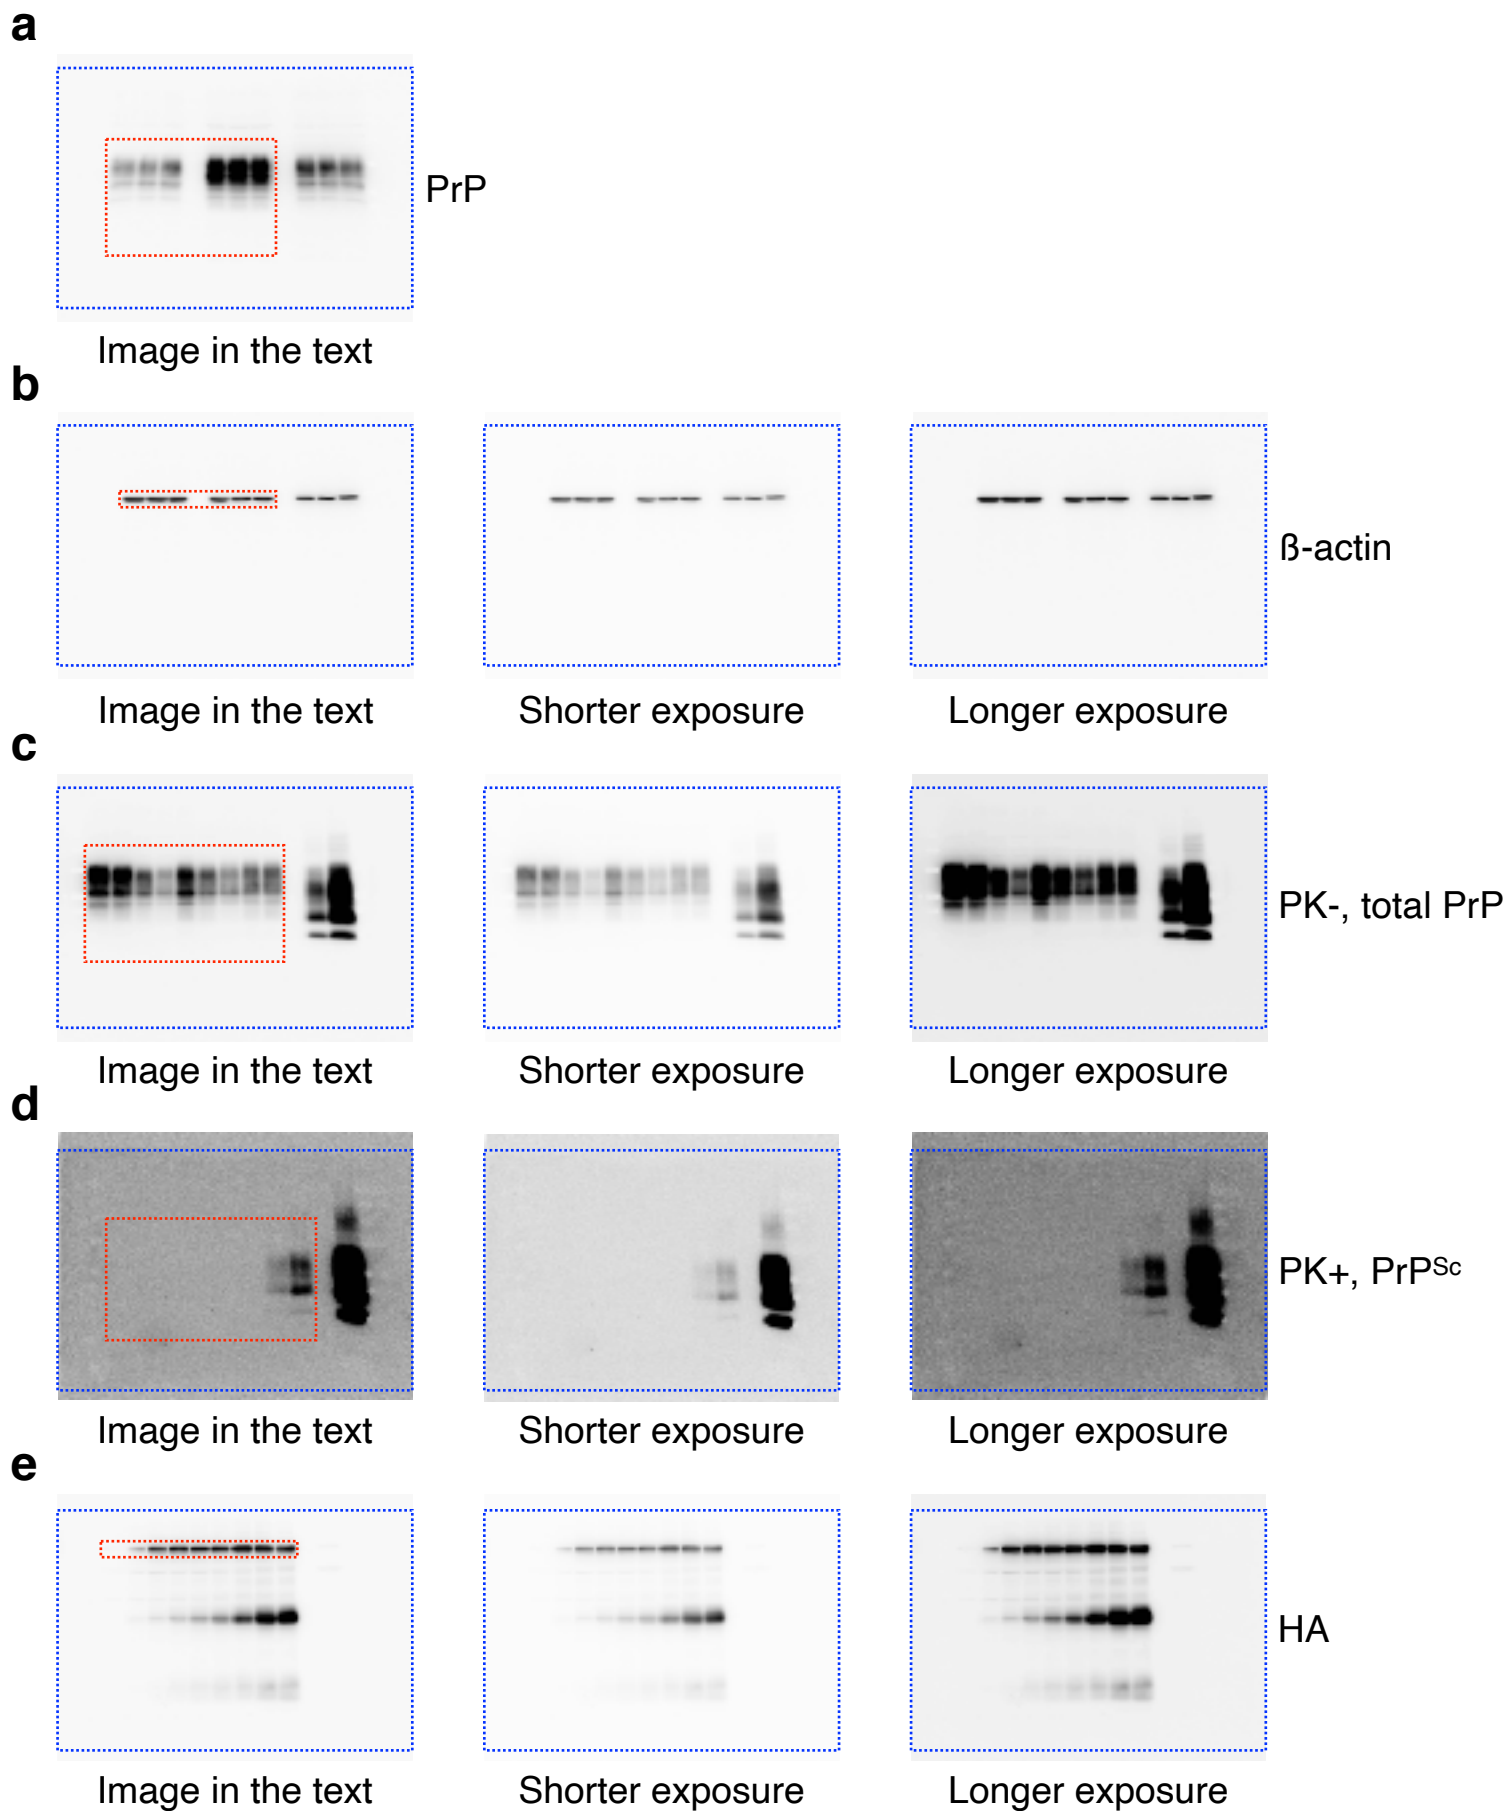

**Supplementary Figure 5. The original western full blots.** **a**, Full blot image for Supplementary Figure 1 (Upper panel). **b**, Full blot images for Supplementary Figure 1 (Lower panel). **c**, Full blot images for Figure 1b (Upper left panel). **d**, Full blot images for Figure 1b (Lower left panel). **e**, Full blot images for Figure 1b (Upper right panel). Blue-dotted rectangles show the membrane edges. Red-dotted rectangles show the images in the text.

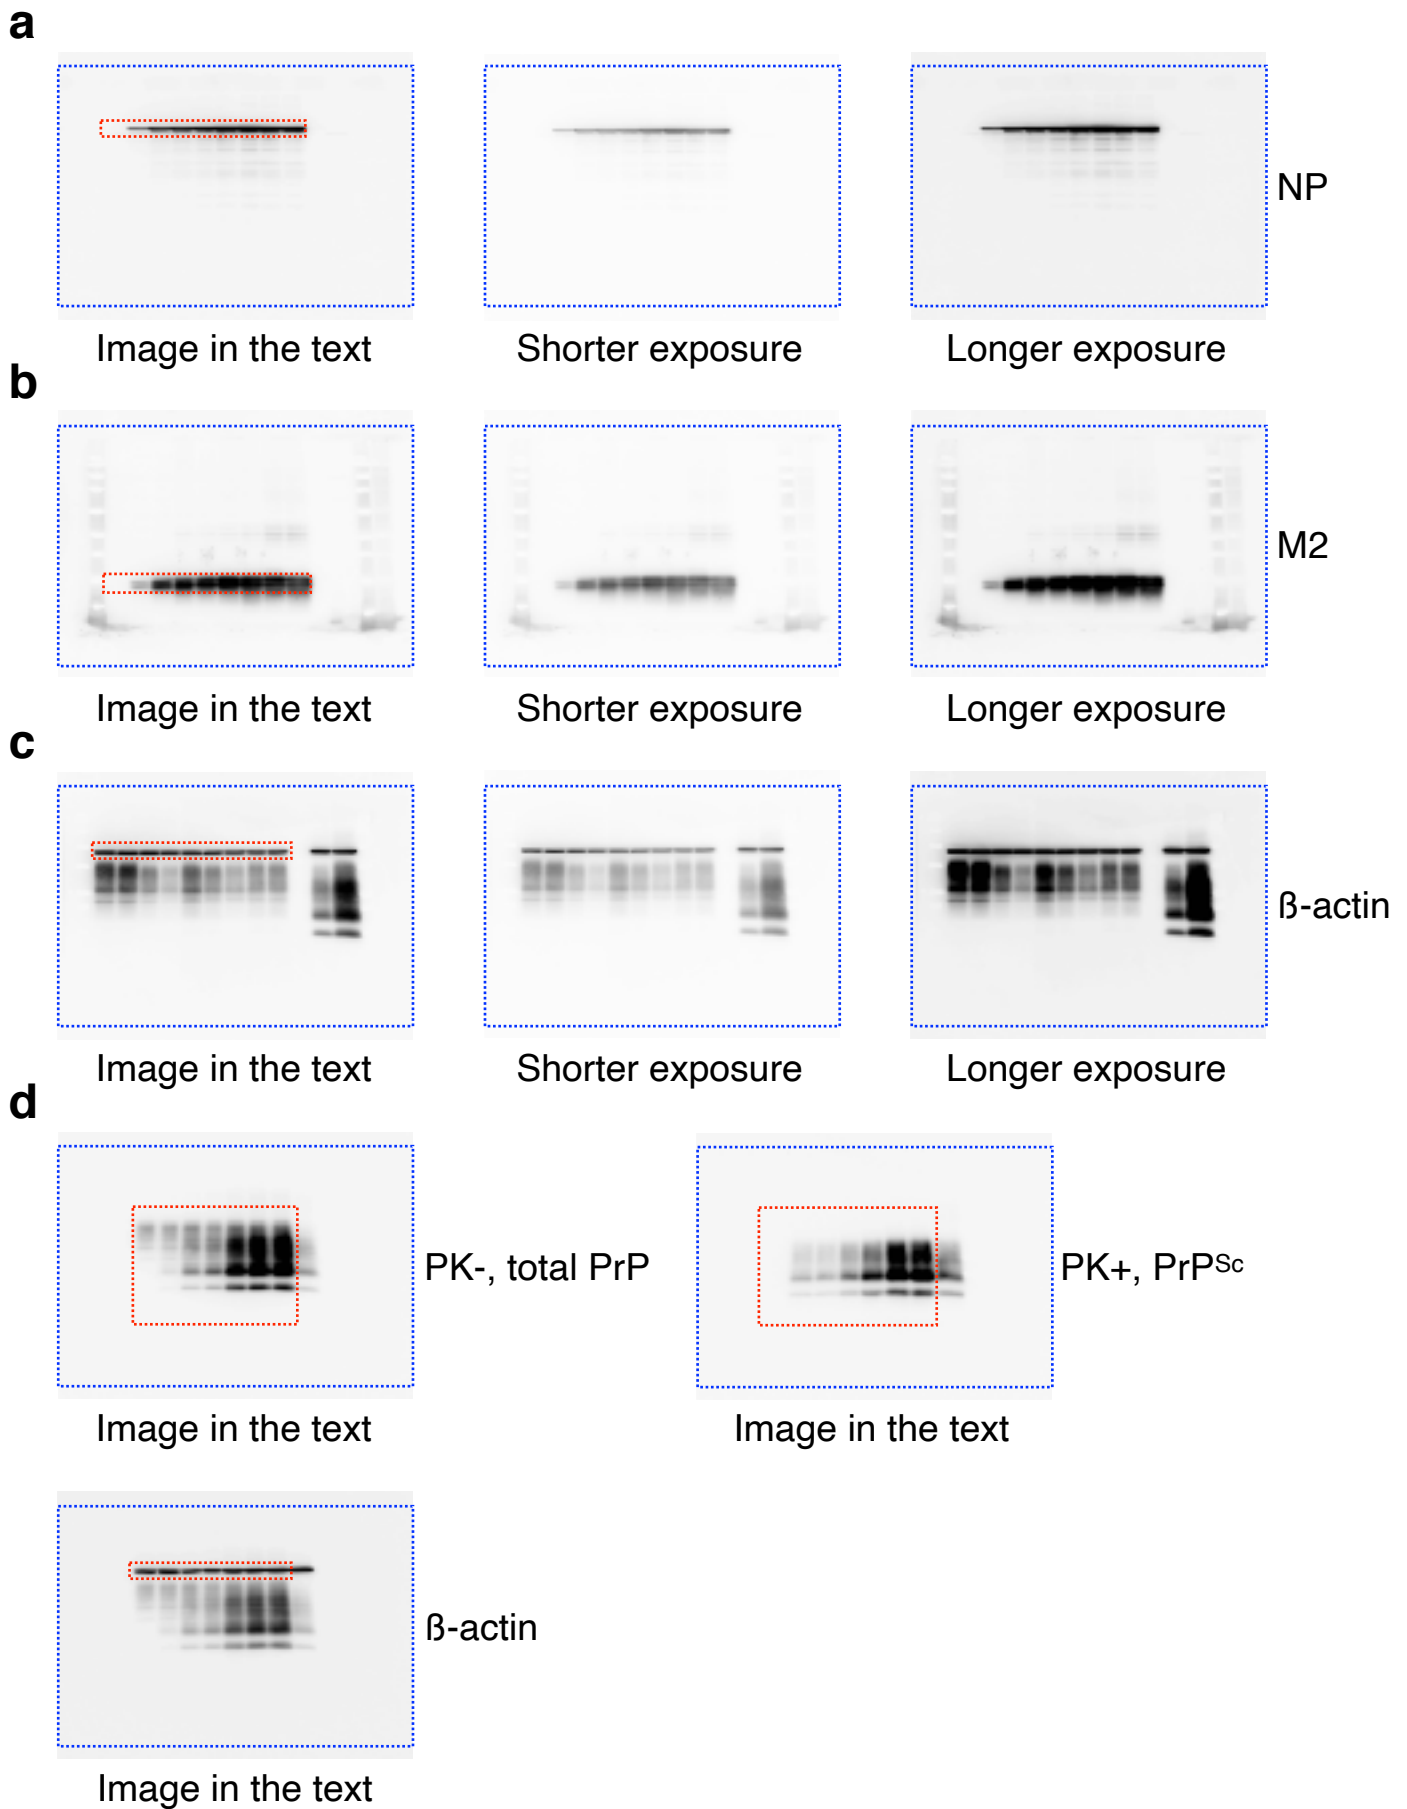

**Supplementary Figure 6. The original western full blots.** **a**, Full blot images for Figure 1b (Upper middle right panel). **b**, Full blot images for Figure 1b (Lower middle right panel). **c**, Full blot images for Figure 1b (Lower right panel). **d**, Full blot images for Figure 1e. Blue-dotted rectangles show the membrane edges. Red-dotted rectangles show the images in the text.

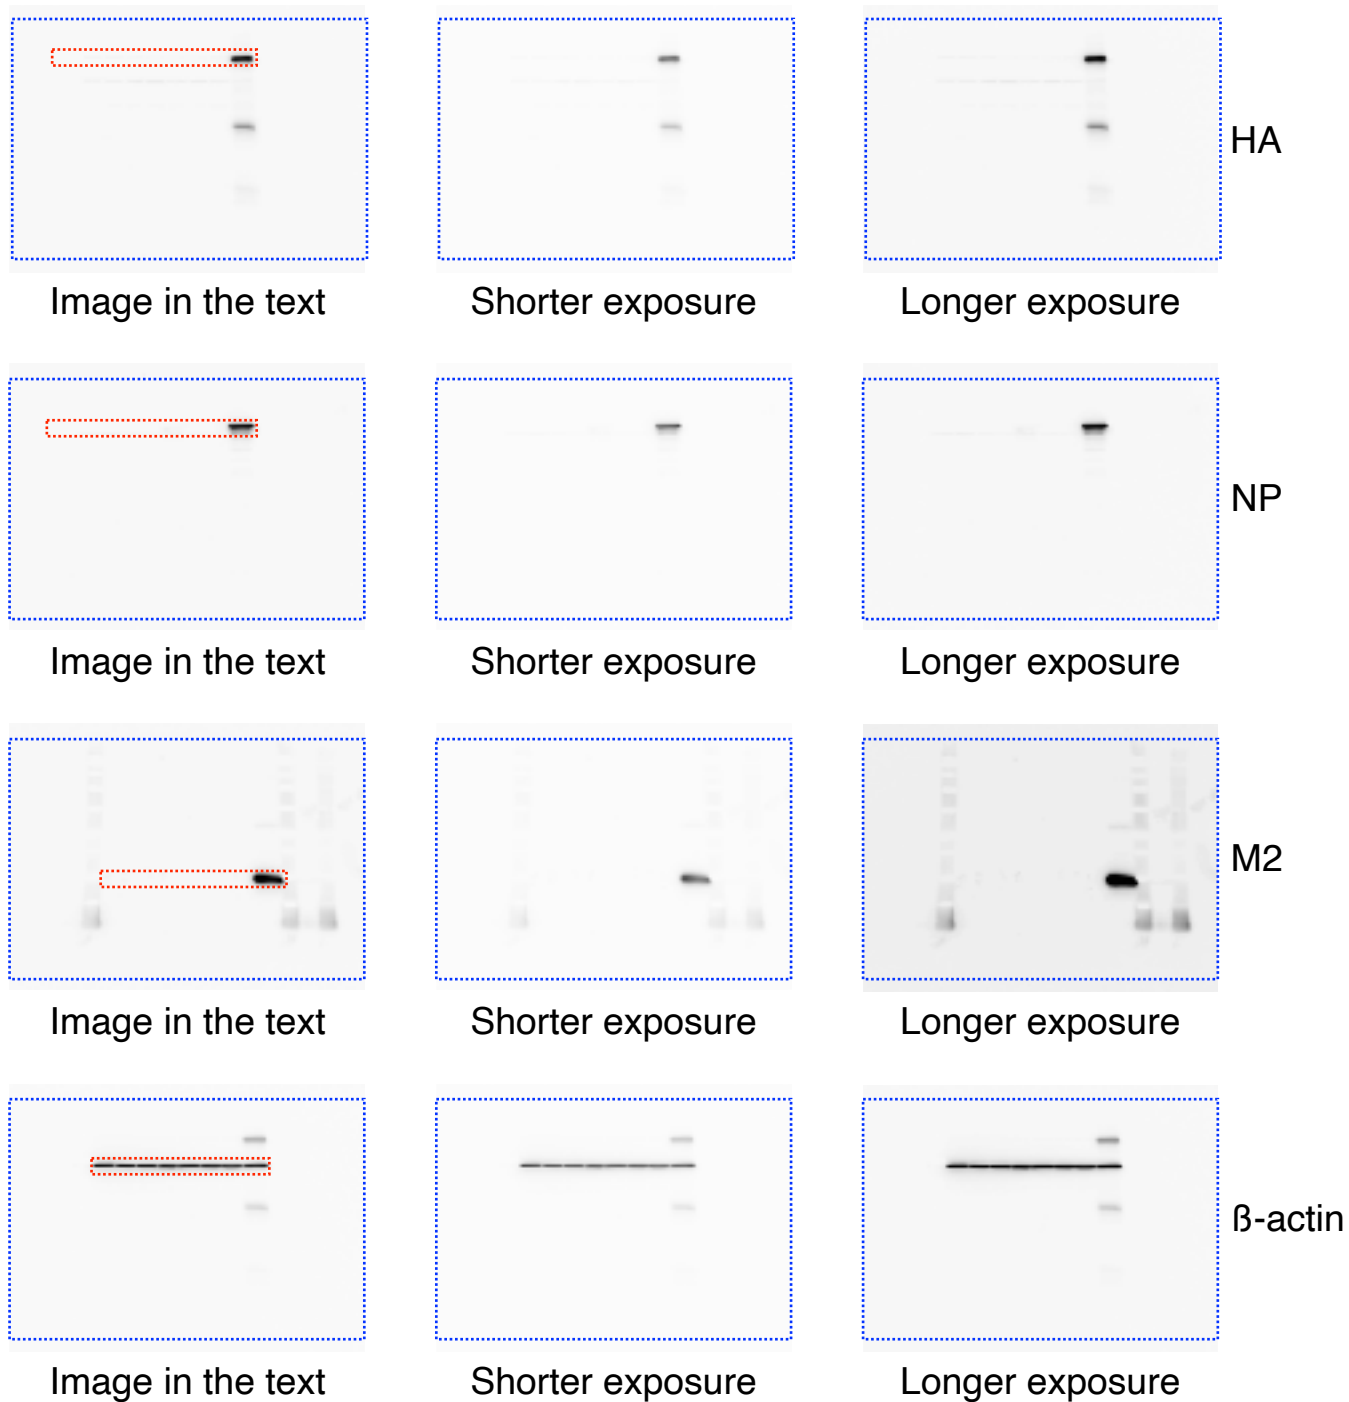

**Supplementary Figure 7. The original western full blots.** Full blot images for Figure 1f. Blue-dotted rectangles show the membrane edges. Red-dotted rectangles show the images in the text.



**a**

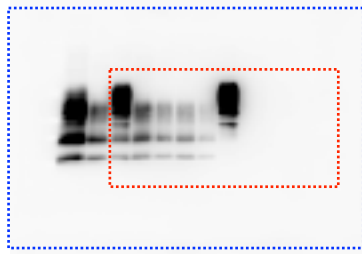

2nd experiment

Image in the text

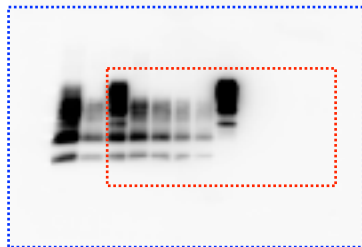

3rd experiment

Image in the text

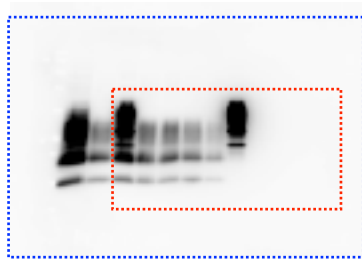

4th experiment

Image in the text

**b**

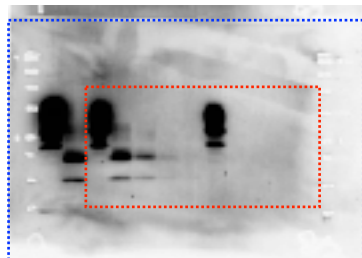

PrP

Image in the text

**Supplementary Figure 8. The original western full blots. a**, Full blot images for Figure 2a. **b**, Full blot image for Figure 2b. Blue-dotted rectangles show the membrane edges. Red-dotted rectangles show the images in the text.

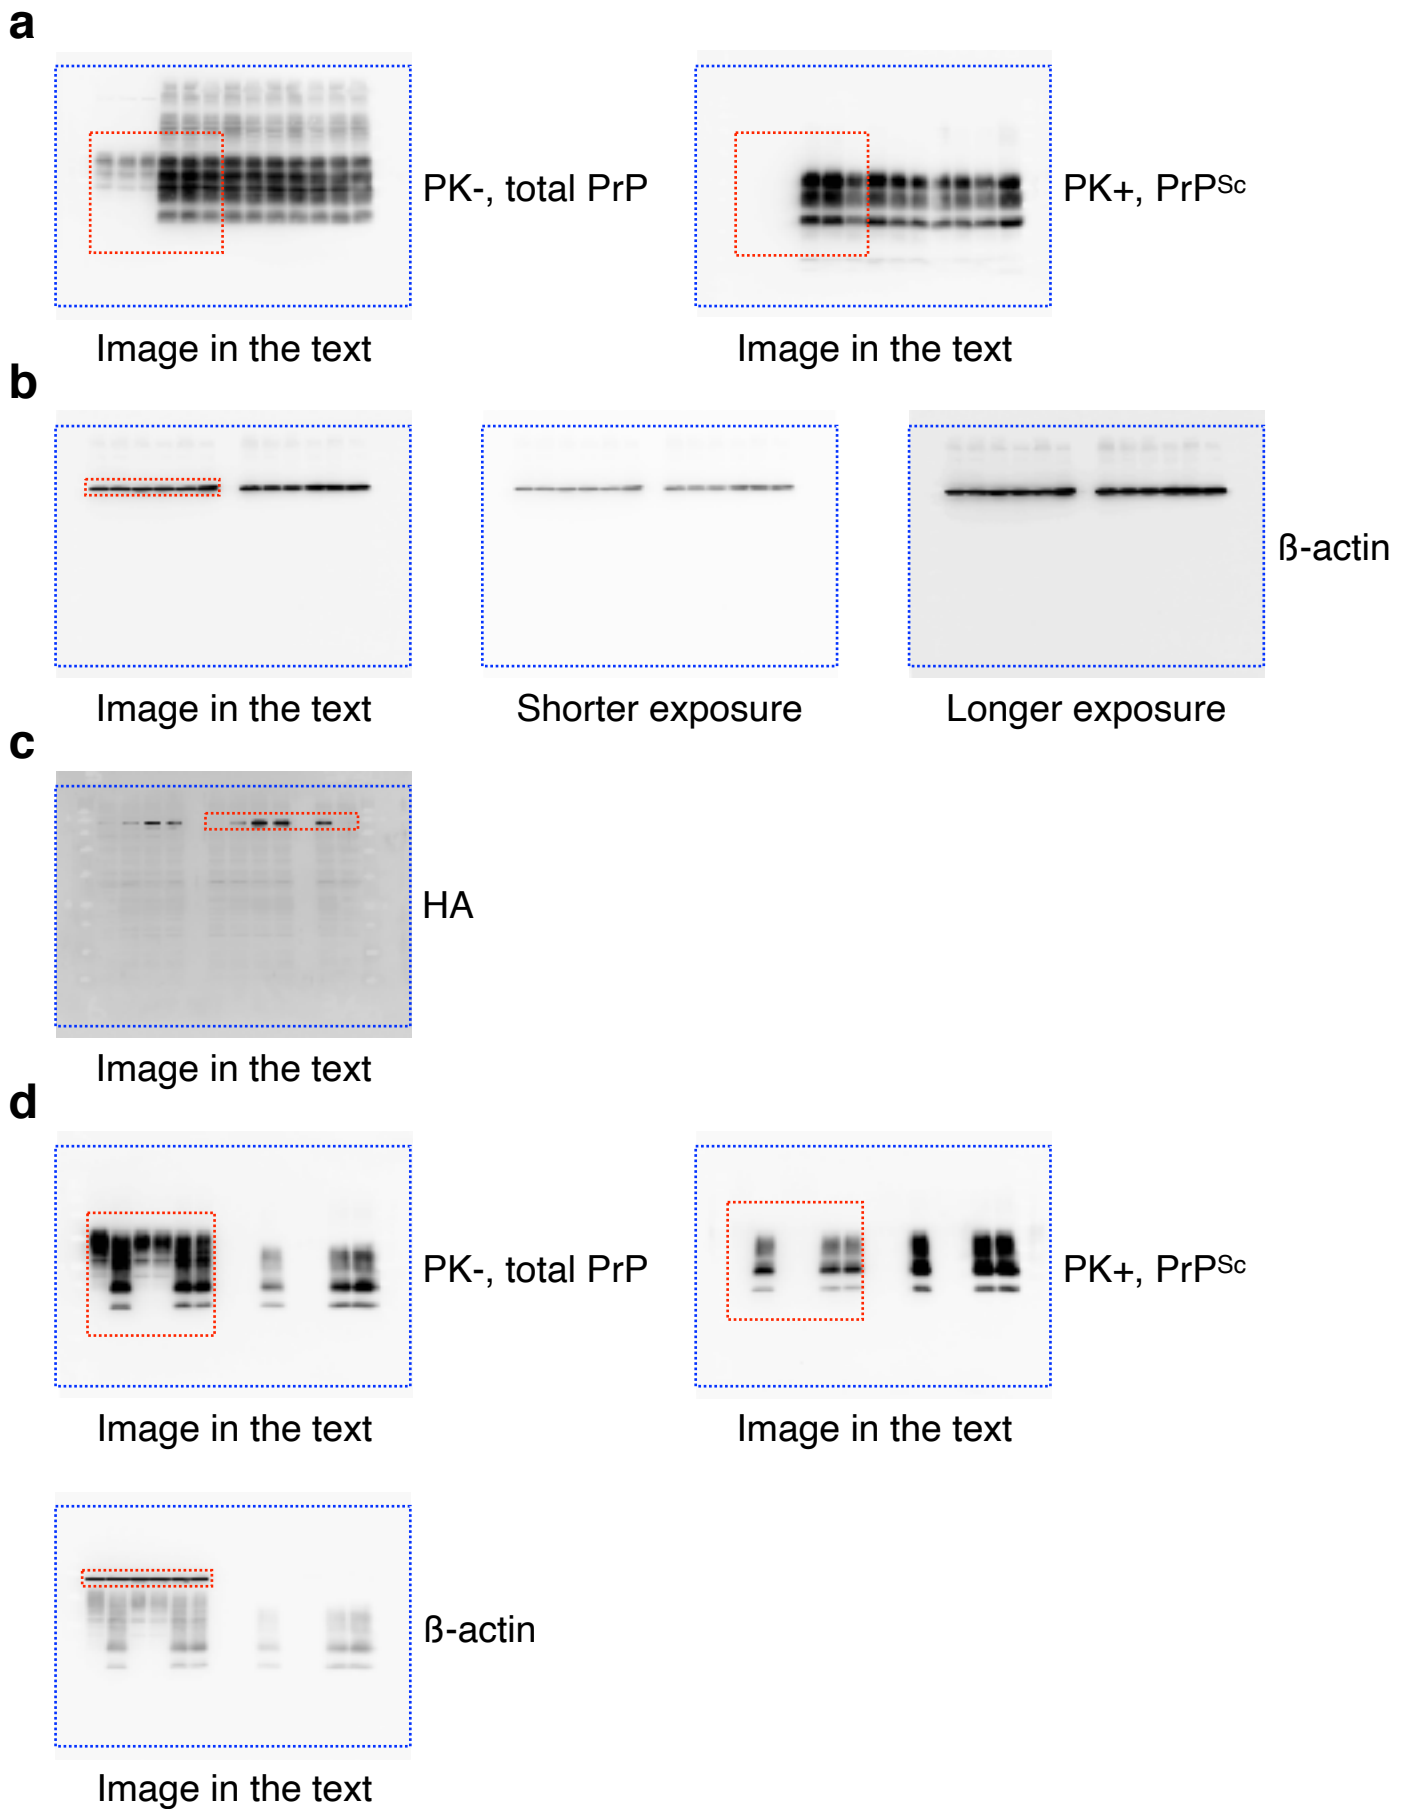

**Supplementary Figure 9. The original western full blots.** **a**, Full blot images for Figure 3b (Upper left and Right panel). **b**, Full blot images for Figure 3b (Lower left panel). **c**, Full blot image for Figure 4a. **d**, Full blot image for Figure 4b. Blue-dotted rectangles show the membrane edges. Red-dotted rectangles show the images in the text.

**a**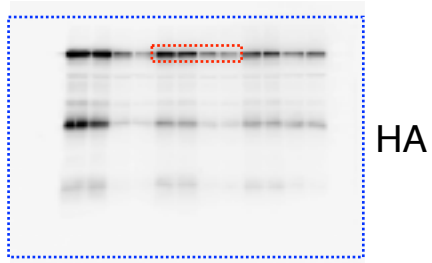

Image in the text

**b**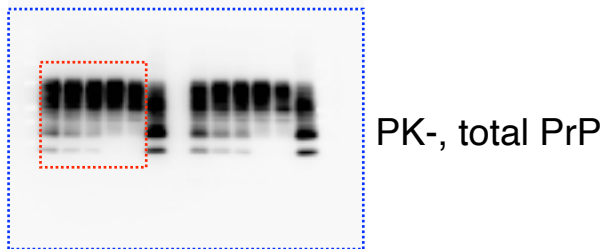

Image in the text

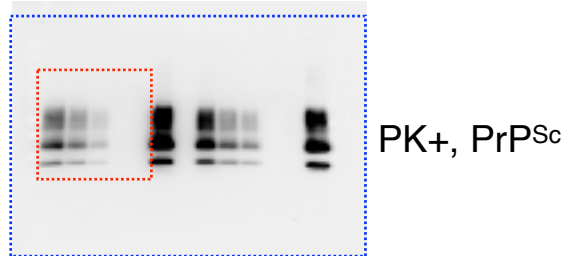

Image in the text

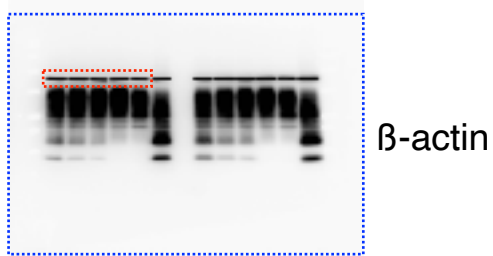

Image in the text

**c**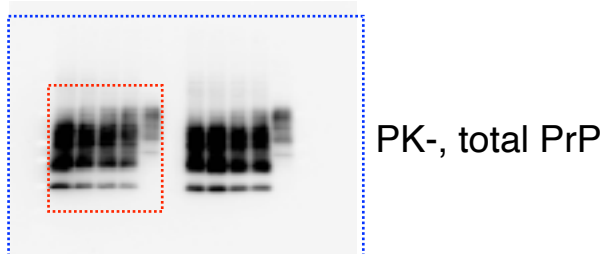

Image in the text

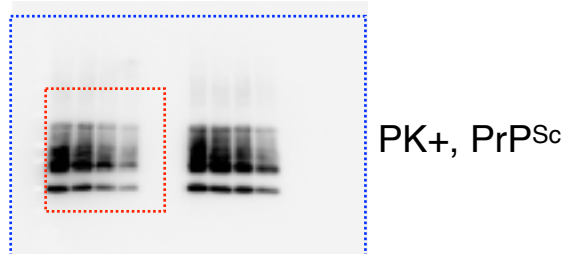

Image in the text

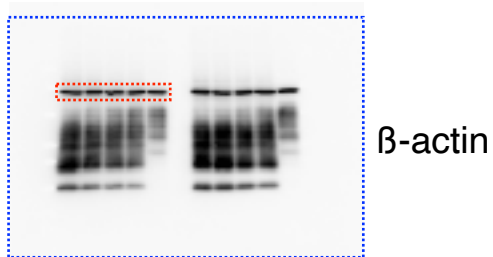

Image in the text

**Supplementary Figure 10. The original western full blots. a**, Full blot image for Figure 4c. **b**, Full blot images for Figure 4c (Left panels). **c**, Full blot images for Figure 4c (Right panels). Blue-dotted rectangles show the membrane edges. Red-dotted rectangles show the images in the text.

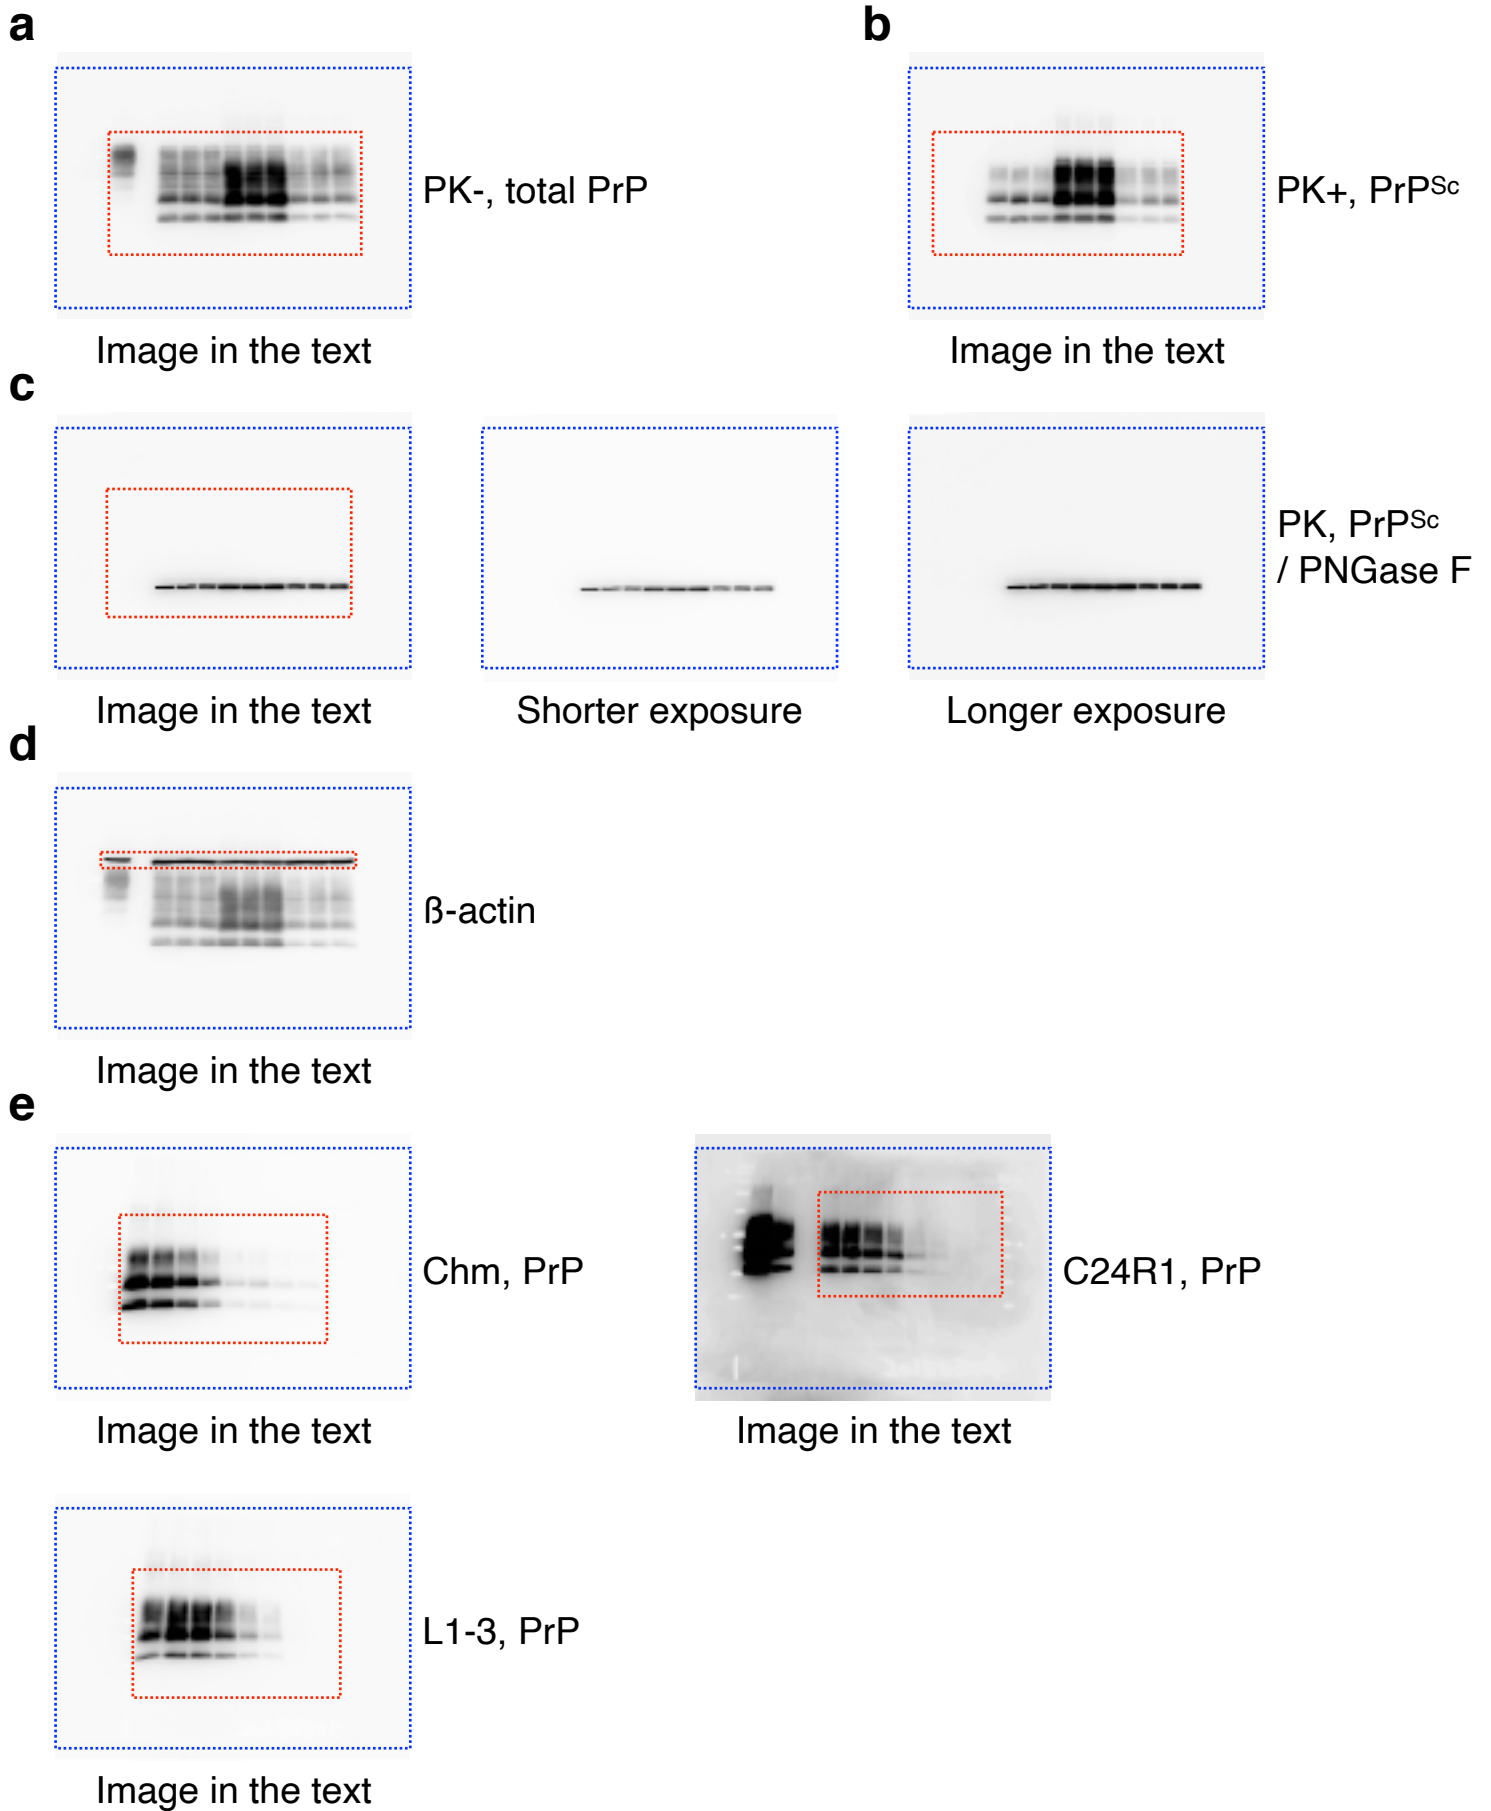

**Supplementary Figure 11. The original western full blots.** **a**, Full blot image for Figure 6a (Upper left panel). **b**, Full blot image for Figure 6a (Middle panel). **c**, Full blot images for Figure 6a (Right panel). **d**, Full blot image for Figure 6a (Lower left panel). **e**, Full blot images for Figure 6c. Blue-dotted rectangles show the membrane edges. Red-dotted rectangles show the images in the text.
